# Supplementary material
Source: PubMed Central journal article supplement (PMC6830502)
Supplement: jamainternmed-180-70-s002.pdf [file jamainternmed-180-70-s002.pdf]

## Supplementary Online Content

Yancy WS Jr, Crowley MJ, Dar MS, et al. Comparison of group medical visits combined with intensive weight management vs group medical visits alone for glycemia in patients with type 2 diabetes: a noninferiority randomized clinical trial. *JAMA Intern Med*. Published online November 4, 2019. doi:10.1001/jamainternmed.2019.4802

**eMethods.** Statistical Methods Technical Appendix

**eTable 1.** Mean (SD) Calorie and Macronutrient Intake for Weight Management/Group Medical Visit (WM/GMV) and Group Medical Visit (GMV) Arms by Time Point

**eTable 2.** Minutes of Activity Per Week for Weight Management/Group Medical Visit (WM/GMV) and Group Medical Visit (GMV) Arms by Time Point

**eTable 3.** Estimated Means and Mean Differences (95% CI) of Clinical and Laboratory Outcomes for Weight Management/Group Medical Visit (WM/GMV) and Group Medical Visit (GMV) Arms by Time Point

### eReferences

This supplementary material has been provided by the authors to give readers additional information about their work.

## **eMethods.** Statistical Methods Technical Appendix

### **1. Model Selection and Fitting process**

The predictors in all models included time effect(s) and associated time-by-arm interaction terms. This model assumes the study arms have equal baseline means, which is appropriate for a randomized control trial and is equivalent in efficiency to an ANCOVA model.(1, 2)

The process for selecting the best model for each outcome was a two-step process.

- In the first step we determined the “best” covariance structure by fitting both “hybrid” models with a random effect for clustering of counseling group over time and different covariance structures that included compound symmetry (CS in SAS commands), autoregressive (AR(1)), Toeplitz (TOEP), spatial exponential (SP(EXP)), spatial power (SP(POW)), and unstructured (UN) for the serial correlation between time points and a set of random coefficient models that included 1) random effect for group and random intercept and linear slope for subjects. These models were fit using REML and AIC model selection criteria were assessed to determine the best fit model.
- In the second step, we used the covariance structure identified in step 1 for each outcome to determine the best mean structure. In this step, we fit separate models using linear time, quadratic time, cubic time and dummy coded time for the fixed effects for each outcome. These models were fit using ML and AIC model selection criteria were assessed to determine the best fit model.

Following this process for each outcome we ran the “best fit” model including stratification variables and estimated arm differences at 48 weeks from these models. All the final models were fit using REML. The final model for hemoglobin A<sub>1c</sub> as determined by this process was used for all subsequent sensitivity analysis. Final model code is available upon request.

### **2. Missing data and Multiple Imputation Procedure**

Longitudinal models fit in our analysis used all available data, including data from participants who had missing observations and/or were lost to attrition, with the estimation procedure implicitly accommodating missing values when related to prior outcome or to other baseline covariates in the model (i.e., missing at random (MAR)).

We also conducted a sensitivity analysis using a multiple imputation (MI) approach that included additional baseline variables beyond those in our random effects models to strengthen the MAR assumption. As a first step, we used t-tests, Wilcoxon rank sum tests and chi-square tests as appropriate to assess each potential baseline variable's association with missingness at 48 weeks, and any variable with an association p-value of 0.25 or less was included in the imputation model. Baseline variables assessed included gender, race, education level, diabetes medicine regime, marital status, distance from VA hospital, whether taking hypertension medications or cholesterol lowering medications, age, age at diagnosis of diabetes, weight, BMI, waist circumference, MES score, PAID score, daily calories consuming, daily grams of fat, carbohydrate, and protein. Of these, the following were associated with missing status at week 48 and therefore included in the imputation model: age, age at diabetes diagnosis, weight, gender, marital status, waist circumference, education level, whether taking a cholesterol medication or not, daily calories and grams of carbohydrate and protein. The imputation model additionally included randomization arm, stratification variables (baseline hemoglobin A<sub>1c</sub> 7.5-8.9% vs. ≥9% and use of multiple types of insulin vs. one type or no insulin, group cohort ID, and all collected hemoglobin A<sub>1c</sub> at the 4 possible time points. Missing hemoglobin A<sub>1c</sub> measurements at any of the 4 time points were imputed using a Markov chain Monte Carlo (MCMC) algorithm with 10 imputations. The imputation provided results that were very similar to the main analysis. For models run on the imputed datasets, WM/GMV was found to be non-inferior to GMV at 48 weeks (estimated mean difference = -0.1%, 95%CI -0.5%, 0.2%; upper 95% CI <0.5%) but not superior to GMV (p=0.44).

### **3. Per-protocol analysis**

For the per-protocol analysis, we fit the primary model to the subset of patients in each arm who attended at least 75% of group sessions (at least 10 of 13 sessions in WM/GMV arm and at least 7 of 9 sessions in GMV arm; n=77 of 127, 61% in WM/GMV arm; n=75 of 136, 55% in GMV arm). In the subset of patients who attended at least 75% of group sessions, only one subject was missing

the week 48 hemoglobin A<sub>1c</sub> measurement. For the per-protocol analysis WM/GMV was found to be non-inferior to GMV at 48 weeks (estimated mean difference = -0.1%, 95%CI -0.5%, 0.3%; upper 95% CI <0.5%) but not superior to GMV (p=0.72).

**eTable 1.** Mean (SD) Calorie and Macronutrient Intake for Weight Management/Group Medical Visit (WM/GMV) and Group Medical Visit (GMV) Arms by Time Point

| <b>Measurement</b>       | <b>N</b> | <b>WM/GMV</b>  | <b>N</b> | <b>GMV</b>     |
|--------------------------|----------|----------------|----------|----------------|
| <b>Calories (kcal)</b>   |          |                |          |                |
| Baseline                 | 112      | 2042.7 (875.3) | 105      | 1879.4 (592.0) |
| 16 weeks                 | 100      | 1848.6 (992.3) | 93       | 1822.4 (839.9) |
| 32 weeks                 | 82       | 1810.2 (616.0) | 87       | 1780.5 (675.6) |
| 48 weeks                 | 94       | 1738.8 (685.3) | 98       | 1824.6 (686.1) |
| <b>Carbohydrates (g)</b> |          |                |          |                |
| Baseline                 | 112      | 194.4 (85.0)   | 105      | 187.7 (85.8)   |
| 16 weeks                 | 100      | 90.3 (53.5)    | 93       | 179.0 (99.3)   |
| 32 weeks                 | 82       | 106.0 (68.6)   | 87       | 165.5 (71.5)   |
| 48 weeks                 | 94       | 113.9 (63.6)   | 98       | 176.2 (87.1)   |
| <b>Fat (g)</b>           |          |                |          |                |
| Baseline                 | 112      | 96.0 (49.7)    | 105      | 87.3 (30.0)    |
| 16 weeks                 | 100      | 111.7 (70.0)   | 93       | 85.7 (50.0)    |
| 32 weeks                 | 82       | 102.1 (40.5)   | 87       | 82.9 (41.1)    |
| 48 weeks                 | 94       | 96.6 (46.7)    | 98       | 85.0 (35.0)    |

| <b>Protein (g)</b> |     |              |     |             |
|--------------------|-----|--------------|-----|-------------|
| Baseline           | 112 | 103.0 (77.1) | 105 | 89.4 (30.4) |
| 16 weeks           | 100 | 121.3 (87.2) | 93  | 86.6 (32.8) |
| 32 weeks           | 82  | 115.7 (56.6) | 87  | 89.9 (37.5) |
| 48 weeks           | 94  | 103.4 (46.5) | 98  | 90.9 (29.8) |

**eTable 2.** Minutes of Activity Per Week for Weight Management/Group Medical Visit (WM/GMV) and Group Medical Visit (GMV) Arms by Time Point

|                                              | WM/GMV |               |               | GMV |               |               |
|----------------------------------------------|--------|---------------|---------------|-----|---------------|---------------|
|                                              | N      | Mean (SD)     | Median (IQR)  | N   | Mean (SD)     | Median (IQR)  |
| <b>Minutes Per Week of Vigorous Activity</b> |        |               |               |     |               |               |
| Baseline                                     | 115    | 102.8 (266.7) | 0 (0)         | 116 | 156.4 (413.6) | 0 (120.0)     |
| 16 weeks                                     | 93     | 101.7 (233.8) | 0 (60.0)      | 94  | 110.0 (293.0) | 0 (90.0)      |
| 32 weeks                                     | 87     | 63.9 (172.8)  | 0 (20.0)      | 84  | 75.6 (233.8)  | 0 (0)         |
| 48 weeks                                     | 92     | 61.0 (194.4)  | 0 (0)         | 88  | 118.3 (394.3) | 0 (0)         |
| <b>Minutes Per Week of Moderate Activity</b> |        |               |               |     |               |               |
| Baseline                                     | 115    | 443.3 (564.9) | 180.0 (705.0) | 116 | 625.3 (796.4) | 300.0 (865.0) |
| 16 weeks                                     | 93     | 629.5 (757.6) | 360.0 (870.0) | 94  | 480.5 (551.1) | 315.0 (540.0) |
| 32 weeks                                     | 87     | 480.7 (703.9) | 240.0 (630.0) | 84  | 518.7 (704.6) | 180.0 (840.0) |
| 48 weeks                                     | 93     | 375.3 (520.6) | 240.0 (480.0) | 89  | 412.0 (664.9) | 180.0 (495.0) |
| <b>Minutes Per Week of Walking</b>           |        |               |               |     |               |               |
| Baseline                                     | 115    | 431.2 (776.6) | 120.0 (480.0) | 116 | 489.3 (698.1) | 180.0 (707.5) |
| 16 weeks                                     | 93     | 404.5 (614.0) | 180.0 (480.0) | 94  | 432.5 (726.5) | 210.0 (415.0) |

|          |    |               |               |    |               |               |
|----------|----|---------------|---------------|----|---------------|---------------|
| 32 weeks | 87 | 322.6 (502.5) | 120.0 (410.0) | 84 | 357.4 (500.5) | 205.0 (457.5) |
| 48 weeks | 93 | 296.3 (460.5) | 120.0 (370.0) | 89 | 468.9 (730.8) | 210.0 (570.0) |



**eTable 3.** Estimated Means and Mean Differences (95% CI) of Clinical and Laboratory Outcomes for Weight Management/Group Medical Visit (WM/GMV) and Group Medical Visit (GMV) Arms by Time Point

| Measurement                                 | WM/GMV Group | GMV Group | Mean Difference (WM/GMV- GMV) (95% CI) | P Value |
|---------------------------------------------|--------------|-----------|----------------------------------------|---------|
| <b>Systolic blood pressure<sup>+</sup></b>  |              |           |                                        |         |
| Baseline                                    | 129.6        | 129.6     |                                        |         |
| 16 weeks                                    | 130.0        | 130.3     | -0.3 (-3.6, 3.0)                       |         |
| 32 weeks                                    | 130.9        | 130.4     | 0.5 (-3.3, 4.2)                        |         |
| 48 weeks                                    | 132.1        | 129.9     | 2.2 (-2.1, 6.5)                        | 0.31    |
| <b>Diastolic blood pressure<sup>+</sup></b> |              |           |                                        |         |
| Baseline                                    | 79.1         | 79.1      |                                        |         |
| 16 weeks                                    | 78.6         | 78.3      | 0.3 (-0.7, 1.3)                        |         |
| 32 weeks                                    | 78.1         | 77.5      | 0.6 (-1.4, 2.7)                        |         |
| 48 weeks                                    | 77.7         | 76.8      | 0.9 (-2.1, 4.0)                        | 0.55    |
| <b>Total cholesterol<sup>#</sup></b>        |              |           |                                        |         |
| Baseline                                    | 153.5        | 153.5     |                                        |         |
| 16 weeks                                    | 147.1        | 152.6     | -5.6 (-15.6, 4.4)                      |         |
| 32 weeks                                    | 156.1        | 152.5     | 3.6 (-6.8, 14.1)                       |         |

|                                    |       |       |                     |      |
|------------------------------------|-------|-------|---------------------|------|
| 48 weeks                           | 156.0 | 154.9 | 1.1 (-9.8, 11.9)    | 0.84 |
| <b>HDL cholesterol<sup>#</sup></b> |       |       |                     |      |
| Baseline                           | 40.8  | 40.8  |                     |      |
| 16 weeks                           | 42.2  | 41.1  | 1.1 (0.3,1.9)       |      |
| 32 weeks                           | 43.6  | 41.5  | 2.2 (0.5, 3.8)      |      |
| 48 weeks                           | 45.0  | 41.8  | 3.2 (0.8, 5.7)      | 0.01 |
| <b>LDL cholesterol<sup>^</sup></b> |       |       |                     |      |
| Baseline                           | 91.3  | 91.3  |                     |      |
| 16 weeks                           | 89.3  | 89.4  | -0.1 (-5.2, 5.0)    |      |
| 32 weeks                           | 90.3  | 90.0  | 0.3 (-5.9, 6.4)     |      |
| 48 weeks                           | 94.5  | 93.3  | 1.2 (-5.9, 8.3)     | 0.74 |
| <b>Triglycerides<sup>#</sup></b>   |       |       |                     |      |
| Baseline                           | 167.7 | 167.7 |                     |      |
| 16 weeks                           | 141.6 | 163.7 | -22.1 (-44.3, 0.1)  |      |
| 32 weeks                           | 163.8 | 176.0 | -12.2(-39.9, 15.6)  |      |
| 48 weeks                           | 160.8 | 176.0 | -15.2 (-41.3, 10.9) | 0.25 |
| <b>Creatinine<sup>~</sup></b>      |       |       |                     |      |
| Baseline                           | 1.1   | 1.1   |                     |      |

|          |     |     |                      |       |
|----------|-----|-----|----------------------|-------|
| 16 weeks | 1.1 | 1.1 | -0.02 (-0.03, -0.00) |       |
| 32 weeks | 1.1 | 1.1 | -0.03 (-0.06, -0.00) |       |
| 48 weeks | 1.1 | 1.1 | -0.05 (-0.09, -0.00) | 0.040 |

<sup>+</sup>Baseline data are missing for 9 participants. Follow-up data at week 16 are missing for 41 participants (19 in WM/GMV and 22 in GMV), at week 32 for 65 participants (31 in WM/GMV and 34 in GMV), and at week 48 for 54 participants (26 in WM/GMV and 28 in GMV).

<sup>#</sup>Follow-up data at week 16 are missing for 36 participants (17 in WM/GMV and 19 in GMV), at week 32 for 50 participants (25 in WM/GMV and 25 in GMV) and at week 48 for 38 participants (18 in WM/GMV and 20 in GMV).

<sup>^</sup>Follow-up data at week 16 are missing for 36 participants (17 in WM/GMV and 19 in GMV), at week 32 for 50 participants (25 in WM/GMV and 25 in GMV) and at week 48 for 39 participants (19 in WM/GMV and 20 in GMV).

<sup>~</sup> Follow-up data at week 16 are missing for 35 participants (17 in WM/GMV and 18 in GMV), at week 32 for 50 participants (25 in WM/GMV and 25 in GMV) and at week 48 for 38 participants (19 in WM/GMV and 19 in GMV).

## eReferences

1. Liu GF, Lu K, Mogg R, Mallick M, Mehrotra DV. Should baseline be a covariate or dependent variable in analyses of change from baseline in clinical trials? *Stat Med.* 2009;28(20):2509-30.
2. Fitzmaurice GM, Laird NM, Ware JH. *Applied longitudinal analysis.* Hoboken, NJ: Wiley-Interscience; 2004.
