# Supplementary material
Source: PubMed Central journal article supplement (PMC6830502)
Supplement: jamainternmed-180-70-s003.pdf [file jamainternmed-180-70-s003.pdf]

## Data Sharing Statement

Yancy, Jr. Comparison of Group Medical Visits Combined With Intensive Weight Management vs Group Medical Visits Alone for Glycemia in Patients With Type 2 Diabetes. *JAMA Intern Med*. Published November 04, 2019. 10.1001/jamainternmed.2019.4802

### Data

**Data available:** No

### Additional Information

**Explanation for why data not available:** Data may be made available upon request from the first author.
